# Supplementary material for: Identification of Highly Selective Surface Pathways for Methane Dry Reforming Using Mechanochemical Synthesis of Pd–CeO2
Source: PubMed Central journal article supplement (PMC9595205; doi:10.1021/acscatal.2c01120), 2022-10-07
Supplement: cs2c01120_si_001.pdf [file cs2c01120_si_001.pdf]

# Identification of Highly Selective Surface Pathways for Methane Dry Reforming using Mechano-Chemical Synthesis of Pd-CeO<sub>2</sub>

## *Supplementary Information*

*Juan D. Jiménez<sup>1†</sup>, Luis E. Betancourt<sup>1†</sup>, Maila Danielis<sup>2</sup>, Hong Zhang<sup>3</sup>, Feng Zhang<sup>3</sup>,  
Ivan Orozco<sup>3</sup>, Wenqian Xu<sup>4</sup>, Jordi Llorca<sup>5</sup>, Ping Liu<sup>1,3</sup>, Alessandro Trovarelli<sup>2</sup>,  
José A. Rodríguez<sup>1,3</sup>, Sara Colussi<sup>\*2</sup>, and Sanjaya D. Senanayake<sup>\*1</sup>*

<sup>1</sup> Chemistry Division, Brookhaven National Laboratory, Upton, NY, 11793 USA

<sup>2</sup> Polytechnic Department and INSTM, University of Udine, Via del Cottonificio 108, 33100  
Udine, Italy

<sup>3</sup> Department of Chemistry, State University of New York Stony Brook, Stony Brook, NY,  
11794 USA

<sup>4</sup> X-ray Science Division, Advanced Photon Source, Argonne National Laboratory, Lemont, IL,  
60439 USA

<sup>5</sup> Institute of Energy Technologies and Department of Chemical Engineering, Universitat  
Politécnica de Catalunya, EEBE, Eduard Maristany 10-14, 08018 Barcelona, Spain

† Authors Contributed Equally

\* Corresponding Authors: [ssenanay@bnl.gov](mailto:ssenanay@bnl.gov), [sara.colussi@uniud.it](mailto:sara.colussi@uniud.it).

## Weisz-Prater and Anderson Criteria Analysis

The internal mass transfer limitation of the system was explored via a Weisz-Prater Criterion analysis where the LHS of the equation should be  $\ll 1.0$  to rule out internal mass transfer limitations:

$$\frac{r'_A \rho_c R_p^2}{D_e C_{AS}} \ll 1.0$$

Where  $r'_A$  is the measured reaction rate,  $\rho_c$  is the pellet density,  $R_p$  is the pellet radius,  $D_e$  is the effective diffusivity, and  $C_{AS}$  is the surface concentration.  $D_e$  is given by equation 2

$$D_e = \frac{D_{CH_4-N_2} \phi_p \sigma}{\tau}$$

Where  $\phi_p$  is the pellet porosity,  $\sigma$  is the constriction factor, and  $\tau$  is the tortuosity and  $D_{CH_4-N_2}$  is the diffusion coefficient. A general approximation of  $\phi_p=0.4$ ,  $\sigma=0.8$ , and  $\tau=3$  was used for the catalyst. The diffusion coefficient for  $CH_4$  and  $N_2$  is given by:

$$D_{CH_4-N_2} = \frac{0.00266 T^{3/2}}{P M_{CH_4-N_2}^{1/2} \sigma_{CH_4-N_2}^2 \Omega_D}$$

where  $T$  is the temperature (K),  $P$  is the pressure (bar),  $M_{CH_4-N_2} = 2 * [(1/M_{CH_4}) + (1/M_{N_2})]^{-1}$ ,  $M_{CH_4}$  = molecular weight of  $CH_4$ ,  $M_{N_2}$  = molecular weight of  $N_2$ ,  $\sigma_{CH_4-N_2}$  = characteristic length (Å) and  $\Omega_D$  is the diffusion collision integral (dimensionless).  $\Omega_D$  is given by Neufeld's approximated diffusion collision integral.<sup>1</sup>

$$\Omega_D = \frac{A}{(T^*)^B} + \frac{C}{\exp(DT^*)} + \frac{E}{\exp(FT^*)} + \frac{G}{\exp(HT^*)}$$

Where  $T^*$  is  $kT/\epsilon_{CH_4-N_2}$ , where  $\epsilon_{CH_4-N_2}$  is the characteristic energy, J, and the rest are known constants.  $\Omega_D$  was found to be 0.749.  $D_{CH_4-N_2}$  was found to be  $1.61 \times 10^{-4}$  m<sup>2</sup>/s,  $D_e$  was  $1.71 \times 10^{-5}$  m<sup>2</sup>/s,  $\rho_c$  was  $7.6 \times 10^3$  kg/m<sup>3</sup>,  $R_p$  was  $\sim 1.07 \times 10^{-4}$  m,  $C_{CH_4}$  was 13.26 mol/m<sup>3</sup>, and  $r_{CH_4}'$  at 700 °C was 0.234 mol/kg/s for PdAcCeO<sub>2</sub>M and 0.131 mol/kg/s for PdCeO<sub>2</sub>IW. The LHS of the Weisz Prater

Criterion was found to be 0.09 and 0.05 for PdAcCeO<sub>2</sub>M and PdCeO<sub>2</sub>IW, respectively, which satisfies the Weisz-Prater Criterion in the high flow, high conversion regime. Furthermore, using the CO<sub>2</sub>-N<sub>2</sub> binary system and the relevant equations shown above with a rate of CO<sub>2</sub> conversion of 0.310 mol/kg/s and 0.231 mol/kg/s at 700 °C for PdAcCeO<sub>2</sub>M and PdCeO<sub>2</sub>IW, respectively, the LHS of the Weisz Prater criterion are 0.16 and 0.11 for PdAcCeO<sub>2</sub>M and PdCeO<sub>2</sub>IW, respectively. Therefore, the system is not mass transfer limited in either CH<sub>4</sub> or CO<sub>2</sub>.

To exclude the presence of internal heat transfer limitations the Anderson criterion was used<sup>2</sup>

$$\frac{|\Delta H_{Rx}|r_{CH_4}\rho_c R^2}{\lambda^e T_s} < 0.75 \frac{R_g T_s}{E}$$

where  $\Delta H_{Rx}$  is the reaction enthalpy (260 kJ/mol),  $r_{CH_4}$  is the observed reaction rate,  $\rho_c$  is the catalyst density,  $R$  is the pellet size radius,  $T_s$  is the reaction temperature (973 K) and  $R_g$  is the gas constant (8.314 J/(mol·K)).  $\lambda^e$  and  $E$  represent the effective thermal conductivity and the experimental activation energy, respectively, for which approximate values were used (11.71 W/(K·m) and 70 kJ/mol, respectively).<sup>3</sup> Using these parameters, we obtain values of  $5.87 \cdot 10^{-4}$  and  $4.4 \cdot 10^{-4}$  for the left term (for PdAcCeO<sub>2</sub>M and PdCeO<sub>2</sub>IW, respectively) and a value of 0.09 on the right term. The criterion is thus satisfied. In addition, it is worth noting that DRM activity tests were performed on 10 mg of powder catalyst diluted with pre-calcined SiO<sub>2</sub> in a 1:2 ratio, as to further reduce the risk of mass and heat transfer limitations.

## DFT results

Each surface is relaxed and minimized for surface species prior adsorption of CO, it is found H, O and C all prefer the fcc site on Pd(111), only except C prefers the hcp site at low coverage, determined by adsorption energy. That is because the fcc site has more fluxionality upon adsorption of C. The horizontal Pd-Pd bond length is 2.794 Å on clean Pd(111), these bonds nearby C adsorption site at low coverage can be slightly extended when C falls in the hollow because the nearby hollows are empty. In case of carbon adsorbed at fcc site, they extended to 2.857 Å (average), and 2.839 Å in the case of hcp site, that means a more Pd-Pd bond tension when adsorbing CO at fcc site which destabilized the surface a bit and further reduced overall adsorption energy. At higher coverage, the Pd-Pd horizontal bond length restraints 2.794 Å nearby hollow sites are also occupied. But regardless of which hollow carbon prefers to stay, the interaction of CO and the surface is not affected because they take place on atop sites.

When the surface is fully covered by hydrogen [Pd(111)<sub>H-1ML</sub>, B.E.: -0.25 ~ -0.22 eV,  $\nu$ : 1862 ~ 2066 cm<sup>-1</sup>] or the hydride is formed [PdH(111)], B.E.: -0.64 ~ -0.46 V,  $\nu$ : 1867 ~ 2068 cm<sup>-1</sup>], the CO binding is greatly weakened together with the increase in vibrational frequency and the site-dependency of CO binding energy is decreased (Table 1). Note that, since the surface is fully covered by hydrogen, to adsorb CO at Pd-hollow site requires the adsorbed hydrogen (\*H) to be pushed away from the original hollow site (Figure S20), which makes it slightly less active than the Pd-bridge site (Table 1) with less shift of \*H. Given that, the corresponding C-O stretching frequency is still higher than that at the Pd-hollow site.

On the oxygen-covered surface [Pd<sub>O-1ML</sub>(111)], the CO adsorption leads to the oxidation to carbonate via C-O bond association (\*CO<sub>3</sub>, Figure S20). As a result, the corresponding binding is very strong (B.E. = -3.29 eV) with low C-O stretching of 1631 cm<sup>-1</sup>. By comparison, when the

surface is fully oxidized [PdO(111)] it is less active with no CO adsorption due to the higher stability of surface oxygen. Note that the partially covered Pd(111) surface was not considered. Wherein the adsorbed \*CO at Pd sites is not likely to survive but favoring the oxidation by neighboring \*O to form CO<sub>2</sub> with an energy release of 0.6 eV.

In the case that the carbon build-up occurs on the surface during the DRM process [Pd<sub>C</sub>(111)], at \*C coverage of 0.25ML CO adsorbed on the Pd-top (B.E. = -1.09 eV,  $\nu = 2057 \text{ cm}^{-1}$ ) next to the adsorbed \*C is slightly more stable than that on Pd-hollow (B.E. = -0.93 eV,  $\nu = 1860 \text{ cm}^{-1}$ ) and Pd-bridge (B.E. = -0.90 eV,  $\nu = 1975 \text{ cm}^{-1}$ ). Like the case of Pd<sub>H</sub>(111), the CO-Pd interaction on Pd<sub>C-0.25ML</sub>(111) is weaker than that on Pd(111), while the C-O stretching frequencies only vary slightly. Besides, the minimal shift of \*C away from the original hollow site on the adsorption of CO at the neighboring Pd sites can result in stronger CO binding at the lower symmetric sites. In contrast, the carbon itself can act as an active site for CO, and the C-top (B.E. = -1.29 eV,  $\nu = 2105 \text{ cm}^{-1}$ ) is the most stable CO adsorption site on Pd<sub>C-0.25ML</sub>(111) via the formation of ketone-like \*CCO species. With the coverage greater than 0.5 ML, the preference of \*CCO over \*CO is greatly increased, where spontaneous shift of \*CO at Pd sites to the neighboring carbon site is observed during the geometry relaxation. This is associated with the decrease in number of available Pd sites and an increase in CO binding (B.E. = -1.86 eV,  $\nu = 2105 \text{ cm}^{-1}$  for Pd<sub>C-0.5ML</sub>, B.E. = -2.63 eV,  $\nu = 2119 \text{ cm}^{-1}$  for Pd<sub>C-1ML</sub>) are less accessible and the strengthening in C-CO interaction with increasing \*C coverage. However, the promoted CO binding at high \*C coverage in this case is likely associated with the increased distortion of surface \*C species on interaction with CO. Thus, the corresponding C-O stretching frequency does not vary significantly once \*CCO species are formed.

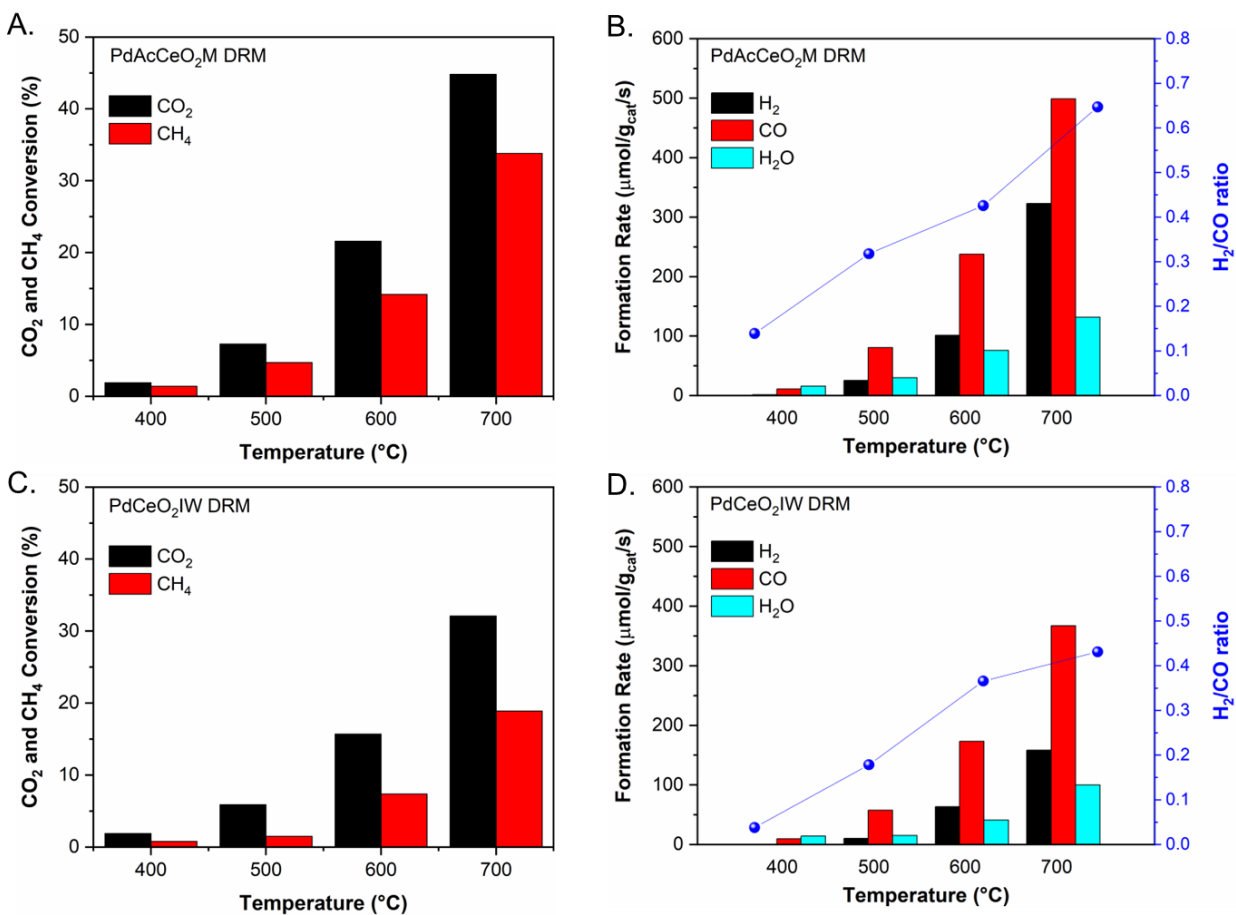

**Figure S1.** Comparison of the measured H<sub>2</sub>, CO and H<sub>2</sub>O reaction rates during DRM reaction over PdAcCeO<sub>2</sub>M (A,B) and PdCeO<sub>2</sub>IW (C,D). Reaction conditions: 10 mL/min CO<sub>2</sub> + 10 mL/min CH<sub>4</sub> + 10 mL/min N<sub>2</sub> with 10.0 mg of the catalyst; weight hourly space velocity (WHSV): 180,000 mL/(g<sub>cat</sub>·h).

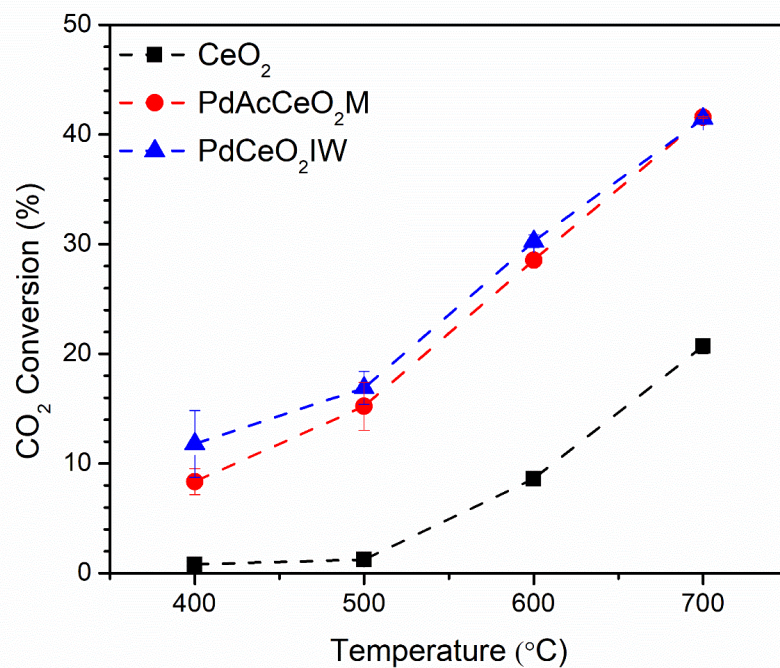

**Figure S2.** Reverse water gas shift reaction over PdAcCeO<sub>2</sub>M, PdCeO<sub>2</sub>IW and blank CeO<sub>2</sub>. CO selectivity >95% over all catalysts between 400-700 °C. Conditions: 1:1:1 ratio of CO<sub>2</sub>:H<sub>2</sub>:N<sub>2</sub> at a WHSV of 180,000 mL/(g<sub>cat</sub>·h) with 10 mg of catalysts loaded, 400 °C H<sub>2</sub> pretreatment for 1 h on all catalysts, online analysis via GC.

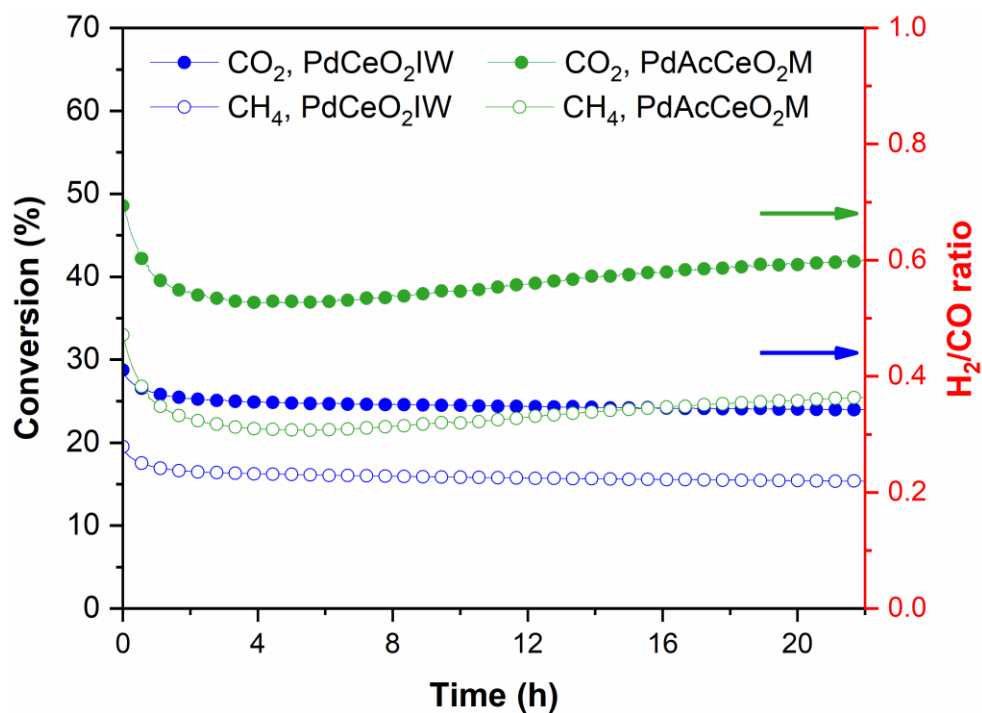

**Figure S3.** Catalytic stability test in DRM conditions for 24 h at 700 °C on the PdAcCeO<sub>2</sub>M (green) and PdCeO<sub>2</sub>IW (blue) samples; solid dots: CO<sub>2</sub> conversion, open dots: CH<sub>4</sub> conversion. H<sub>2</sub>/CO ratio is marked by a green arrow (PdAcCeO<sub>2</sub>M) and blue arrow (PdCeO<sub>2</sub>IW); the H<sub>2</sub>/CO ratio remained constant throughout the experiment.



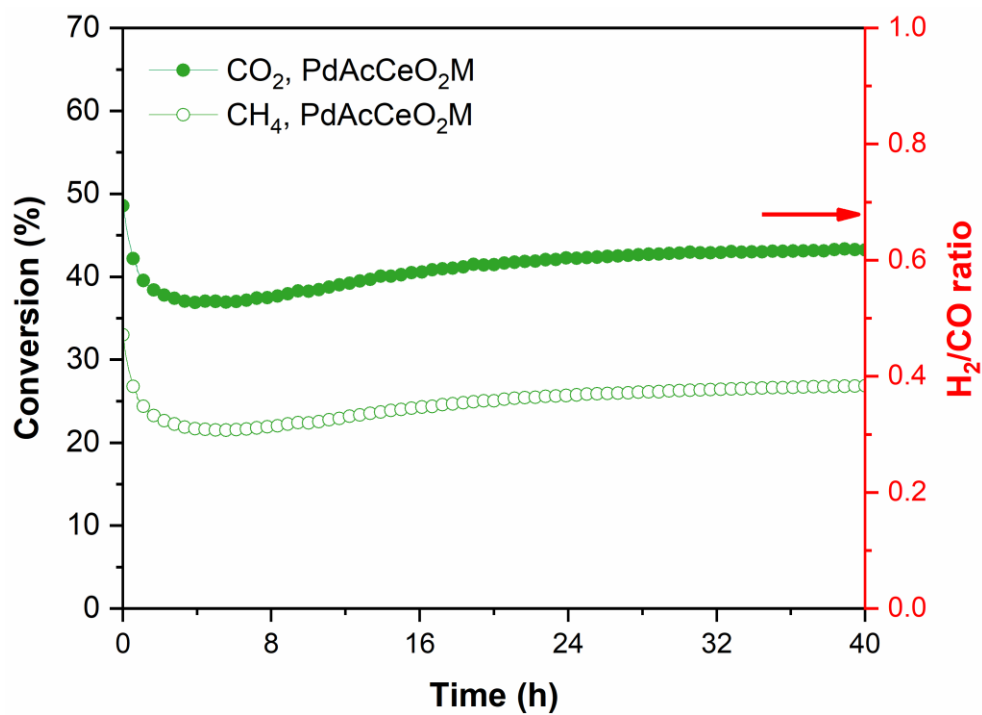

**Figure S4.** Catalytic stability test in DRM conditions for 40 h at 700 °C on PdAcCeO<sub>2</sub>M. Solid dots: CO<sub>2</sub> conversion; open dots: CH<sub>4</sub> conversion; red arrow: H<sub>2</sub>/CO ratio (constant throughout experiment).

**Table S1.** Comparison of catalytic activity for selected catalysts for DRM.

| Catalysts                               | Temperature<br>°C | WHSV<br>mL·g <sub>cat</sub> <sup>-1</sup> ·h <sup>-1</sup> | Metal<br>Loading     | Rate of CH <sub>4</sub> Reaction<br>mol <sub>CH<sub>4</sub></sub> ·g <sub>cat</sub> <sup>-1</sup> ·s <sup>-1</sup> | Ref  |
|-----------------------------------------|-------------------|------------------------------------------------------------|----------------------|--------------------------------------------------------------------------------------------------------------------|------|
| PdAcCeO <sub>2</sub> M                  | 700               | 180000                                                     | 4wt%Pd               | 2.3 x 10 <sup>-4</sup>                                                                                             | This |
| PdCeO <sub>2</sub> IW                   | 700               | 180000                                                     | 4wt%Pd               | 1.3 x 10 <sup>-4</sup>                                                                                             | Work |
| Ni/Mg@Al <sub>2</sub> O <sub>3</sub>    | 650               | 98400                                                      | 1.6wt% Ni            | 3.0 x 10 <sup>-4</sup>                                                                                             | [4]  |
| Ni/La <sub>2</sub> O <sub>3</sub> -LOC  | 700               | 300000                                                     | 5.7wt%Ni             | 2.1 x 10 <sup>-5</sup>                                                                                             | [5]  |
| Ru/CeO <sub>2</sub>                     |                   |                                                            | 0.5wt%Ru             | 3.4 x 10 <sup>-4</sup>                                                                                             |      |
| Ru/TiO <sub>2</sub>                     | 700               | 180000                                                     | 0.5wt%Ru             | 1.6 x 10 <sup>-4</sup>                                                                                             | [6]  |
| Ru/Al <sub>2</sub> O <sub>3</sub>       |                   |                                                            | 0.5wt%Ru             | 7.0 x 10 <sup>-5</sup>                                                                                             |      |
| PdNi-MgO                                | 700               | 70000                                                      | 0.2wt%Pd<br>2.0wt%Ni | 5.6 x 10 <sup>-5</sup>                                                                                             | [7]  |
| ALD Ni/γ-Al <sub>2</sub> O <sub>3</sub> | 850               | 375000                                                     | 4wt%Ni               | 8.6 x 10 <sup>-4</sup>                                                                                             | [8]  |
| 1.5CeO <sub>2</sub> -x-<br>NSNT         | 750               | 96000                                                      | 16wt%Ni              | 2.5 x 10 <sup>-4</sup>                                                                                             | [9]  |

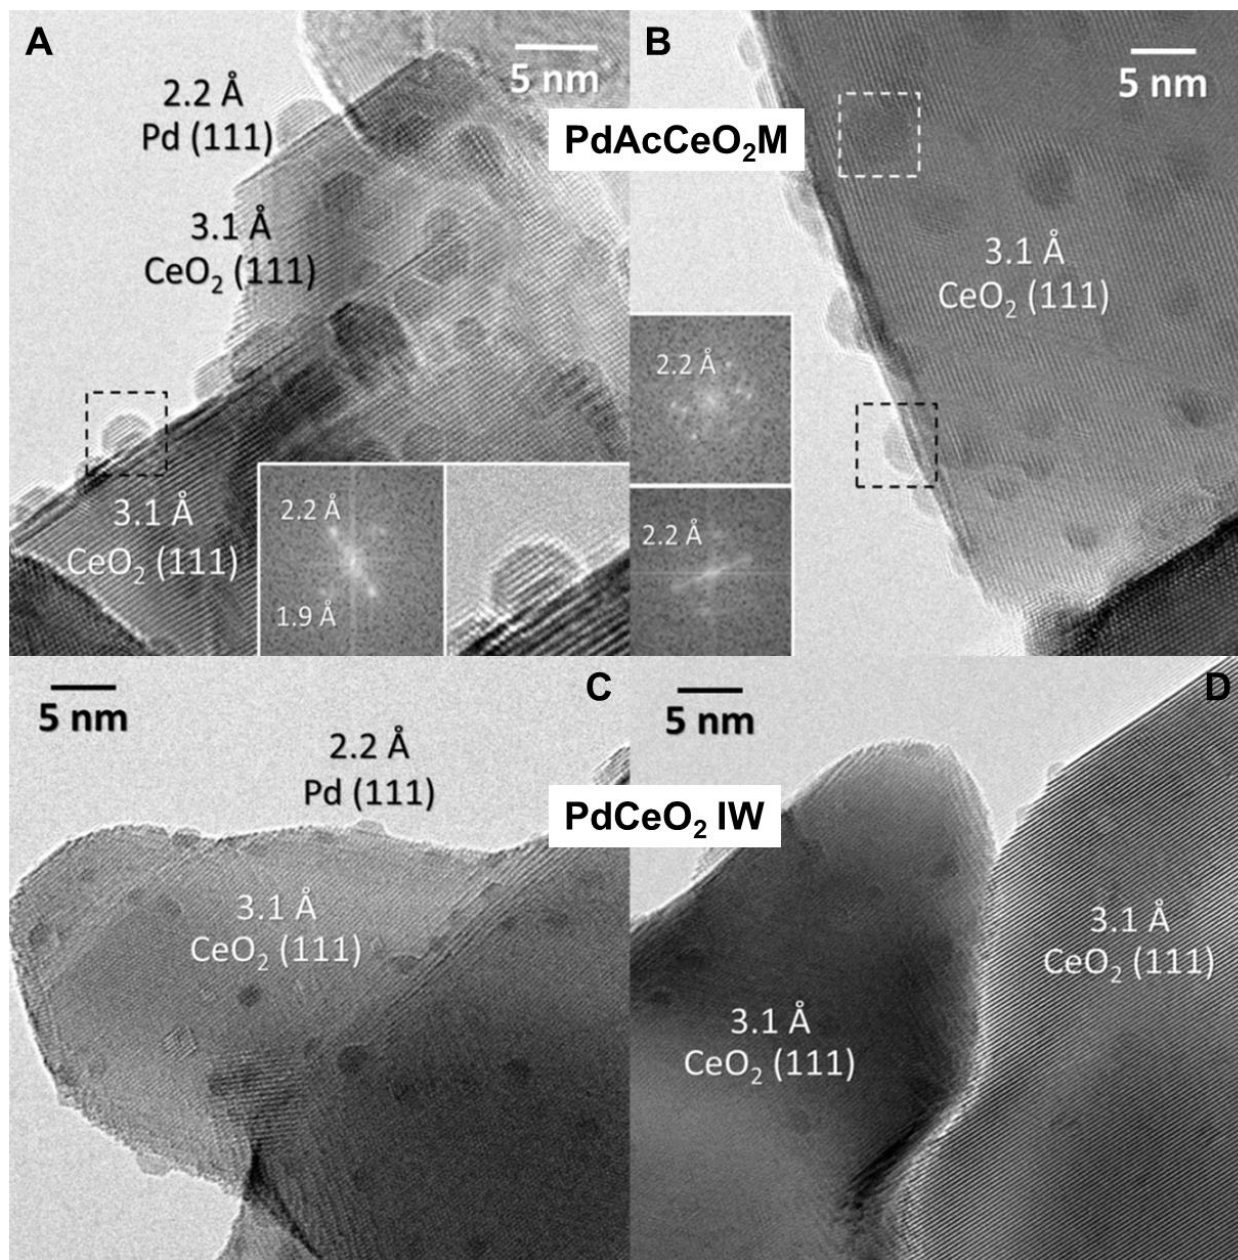

**Figure S5.** HRTEM images of (A-B) PdAcCeO<sub>2</sub>M after H<sub>2</sub> reduction treatment at 400 °C. Insets show the Fourier Transform corresponding to the respective image inside the rectangles under high magnification. (C-D) images of PdCeO<sub>2</sub>IW after H<sub>2</sub> reduction treatment at 400 °C.

**Table S2.** Pd K-edge EXAFS Fitting Results.

| Sample                 | Shell | $R$ (Å)       | C.N.       | $\sigma^2$ (Å <sup>2</sup> ) | $\Delta E_o$ (eV) |
|------------------------|-------|---------------|------------|------------------------------|-------------------|
| PdAcCeO <sub>2</sub> M | Pd-Pd | 2.837 ± 0.003 | 10.4 ± 0.6 | 0.007                        | -7.5              |
| PdCeO <sub>2</sub> IW  | Pd-Pd | 2.785 ± 0.003 | 10.7 ± 0.6 | 0.006                        | -8.6              |

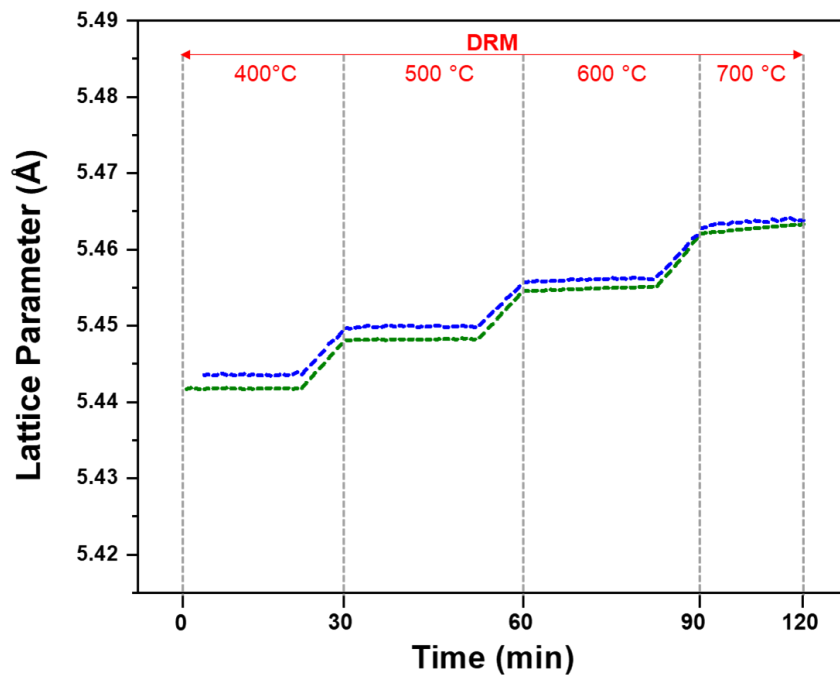

**Figure S6.** Representative Rietveld refinement of the ceria lattice parameter of PdAcCeO<sub>2</sub>M (green) and PdCeO<sub>2</sub>IW (blue) under DRM conditions. Reaction conditions: 25%CO<sub>2</sub>/25%CH<sub>4</sub>/50%He mixture.

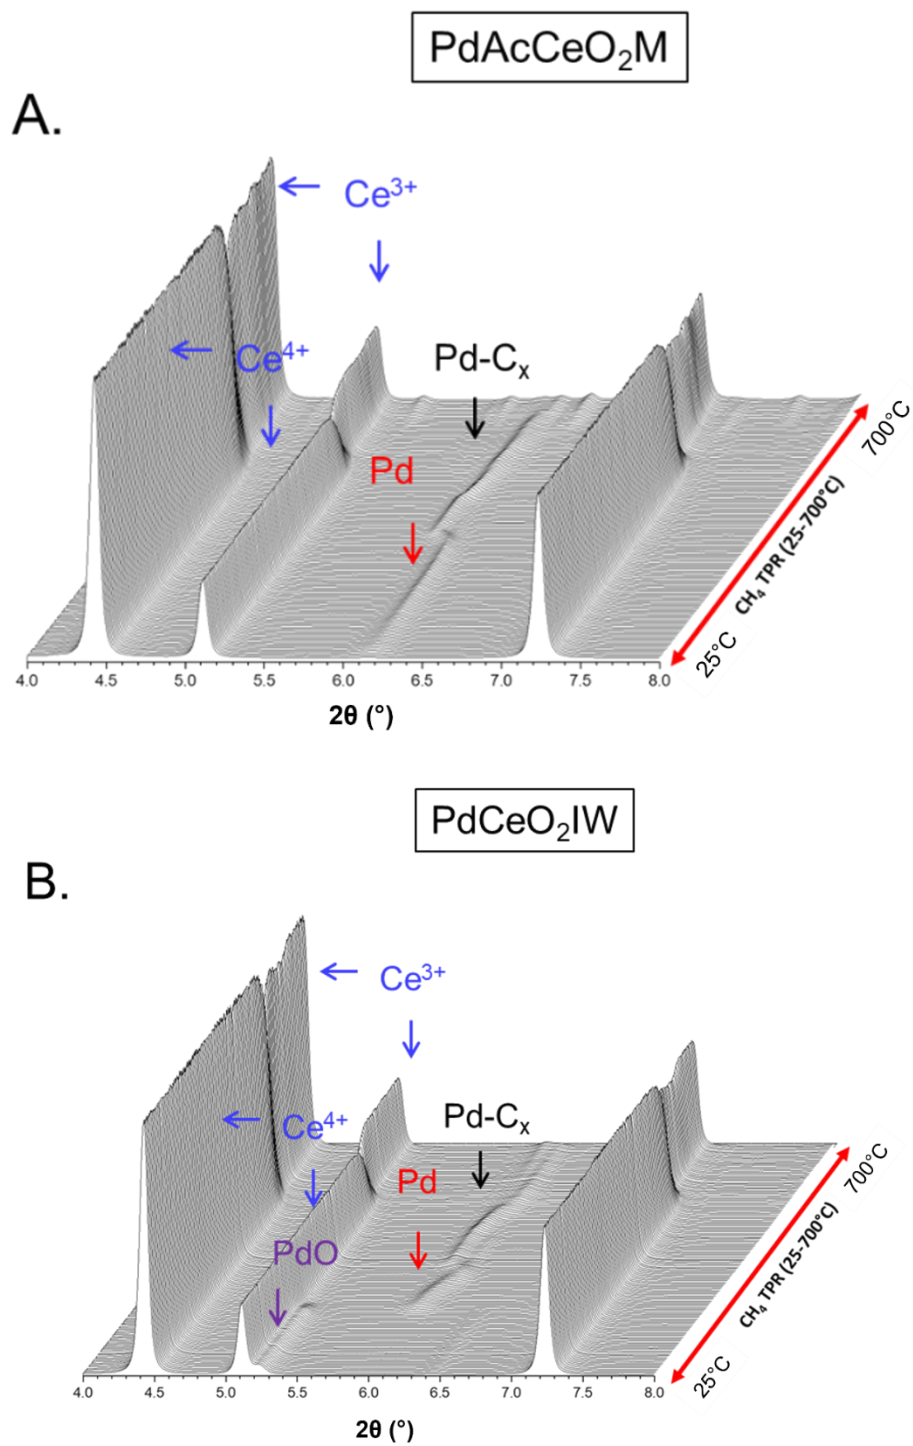

**Figure S7.** *In-situ* XRD profiles of (A) PdAcCeO<sub>2</sub>M and (B) PdCeO<sub>2</sub>IW samples in a CH<sub>4</sub> atmosphere. Reaction conditions: 5 mL/min CH<sub>4</sub> + 5 mL/min He, ramping to 700 °C with a 5 °C/min ramping rate.

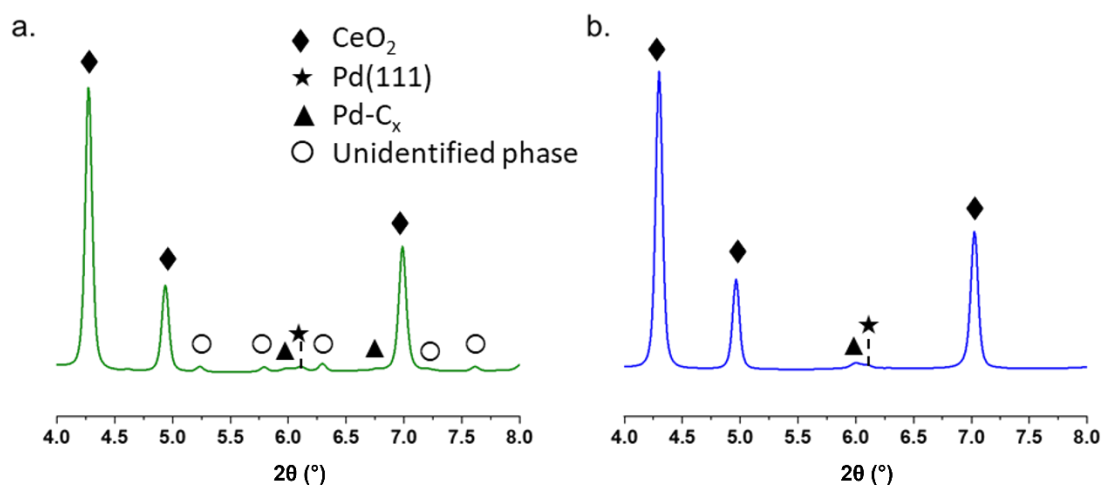

**Figure S8.** *In-situ* XRD profiles at 700 °C of (a) PdAcCeO<sub>2</sub>M and (b) PdCeO<sub>2</sub>IW samples in a CH<sub>4</sub> atmosphere.

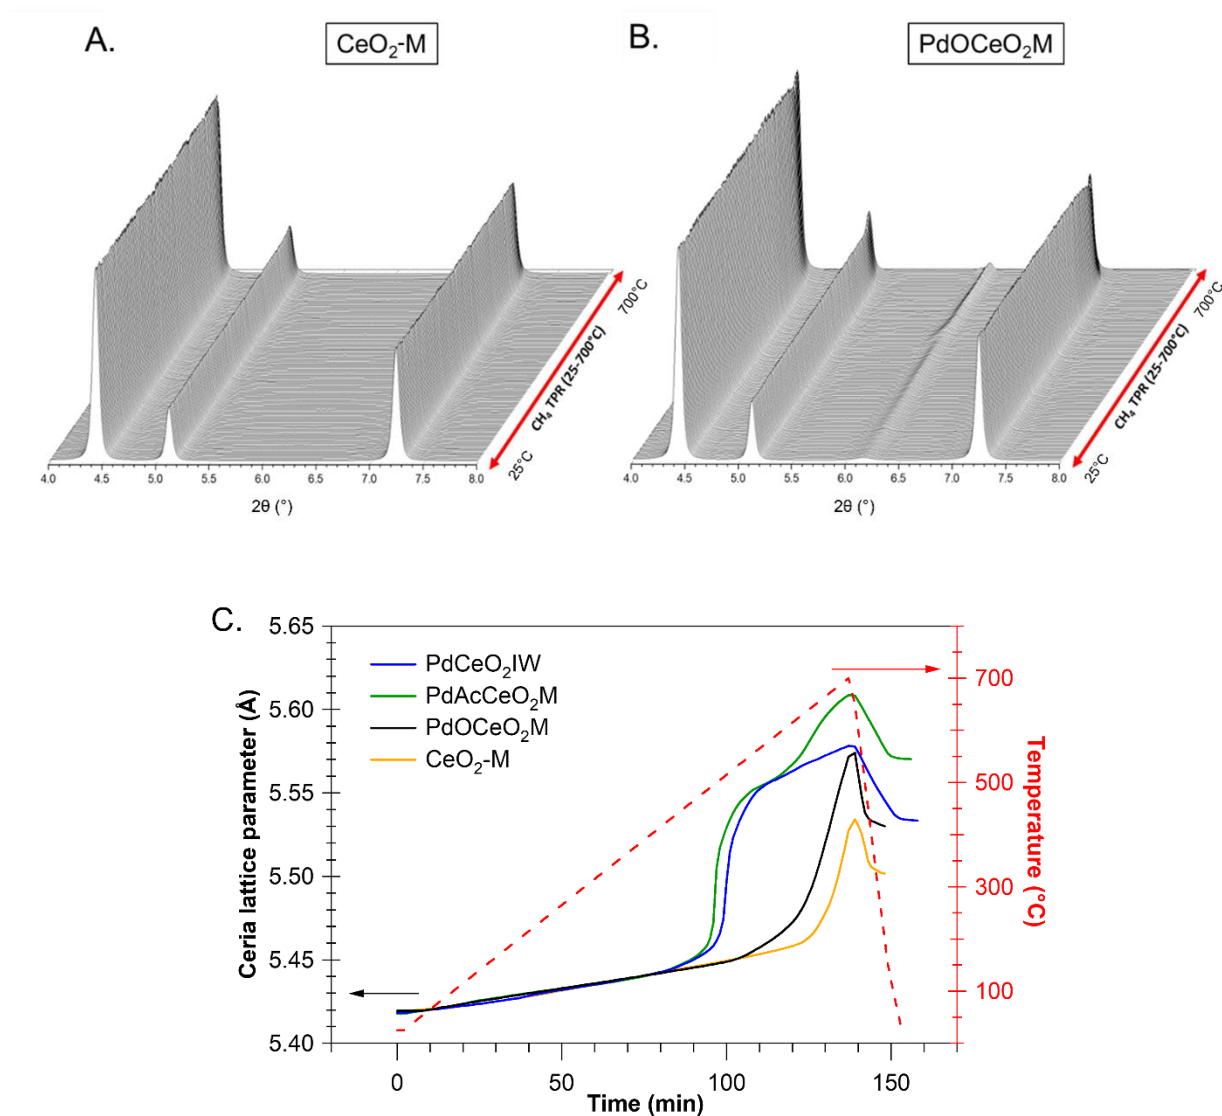

**Figure S9.** *In-situ* XRD profiles of (A) CeO<sub>2</sub>-M and (B) PdOCeO<sub>2</sub>M samples in a CH<sub>4</sub> atmosphere. Reaction conditions: 5 mL/min CH<sub>4</sub> + 5 mL/min He, ramping to 700 °C with a 5 °C/min ramping rate. (C) Rietveld refinement of ceria lattice parameters of PdAcCeO<sub>2</sub>M, PdCeO<sub>2</sub>IW, PdOCeO<sub>2</sub>M and CeO<sub>2</sub>-M under *in-situ* CH<sub>4</sub>-TPR XRD experiments.



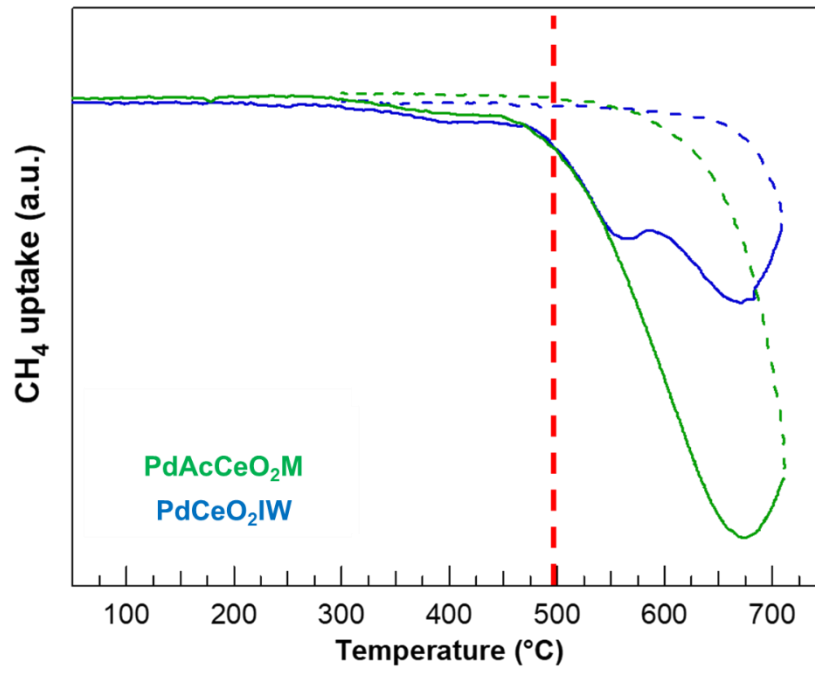

**Figure S10.** CH<sub>4</sub>-TPR uptake measurements under a 25%CH<sub>4</sub>/He atmosphere at a GHSV  $\approx$  400'000 h<sup>-1</sup>.

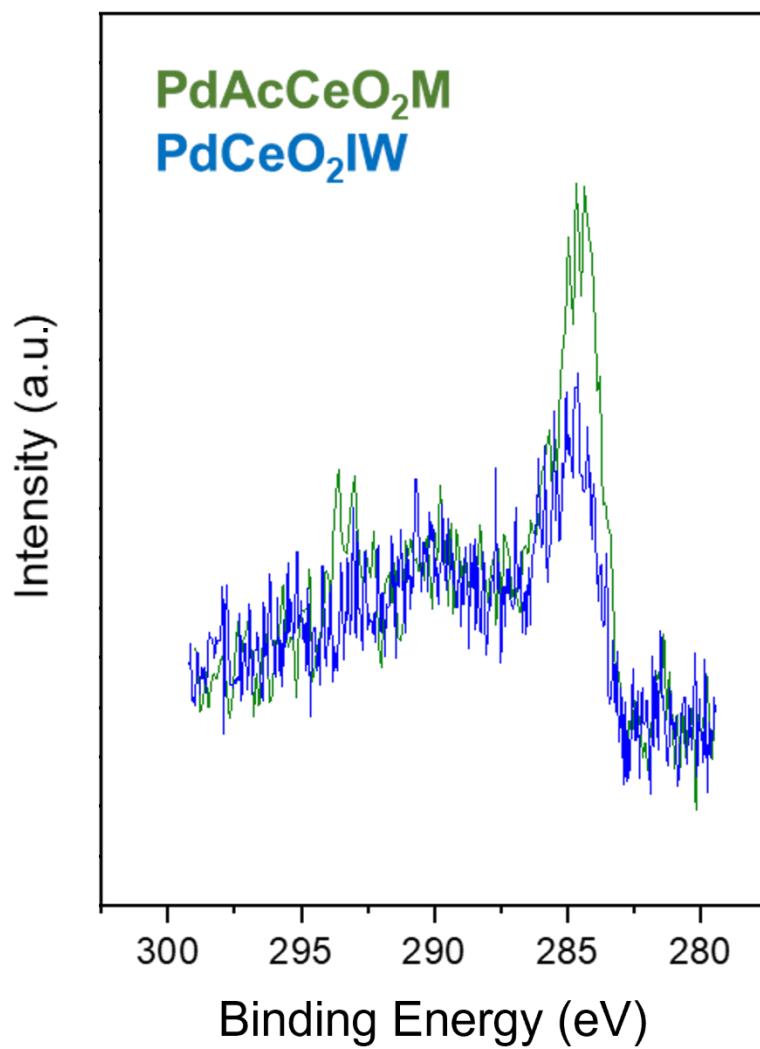

**Figure S11.** *In-situ* XPS profiles at 500 °C of (a) PdAcCeO<sub>2</sub>M and (b) PdCeO<sub>2</sub>IW samples under 10 mTorr of CH<sub>4</sub>.

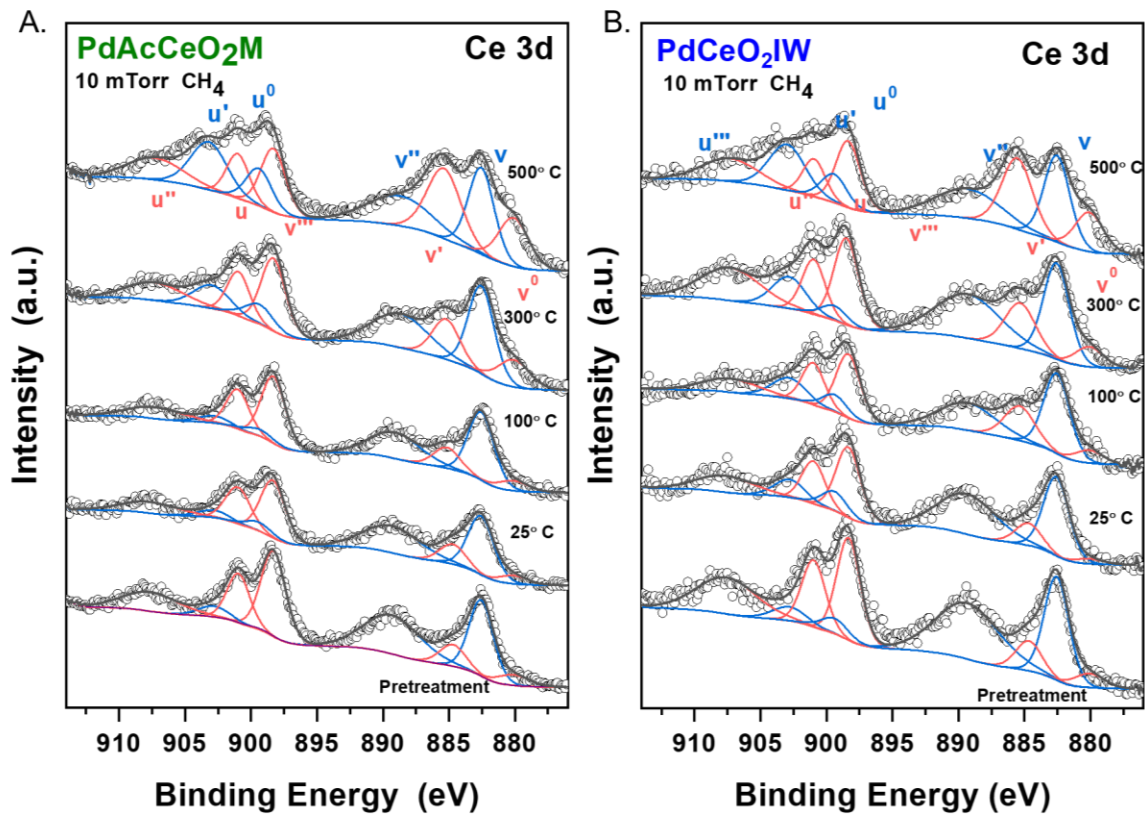

**Figure S12.** Ce 3d AP-XPS spectra of (A) PdAcCeO<sub>2</sub>M and (B) PdCeO<sub>2</sub>IW samples in a 10 mTorr CH<sub>4</sub> atmosphere, from 25 to 500 °C.

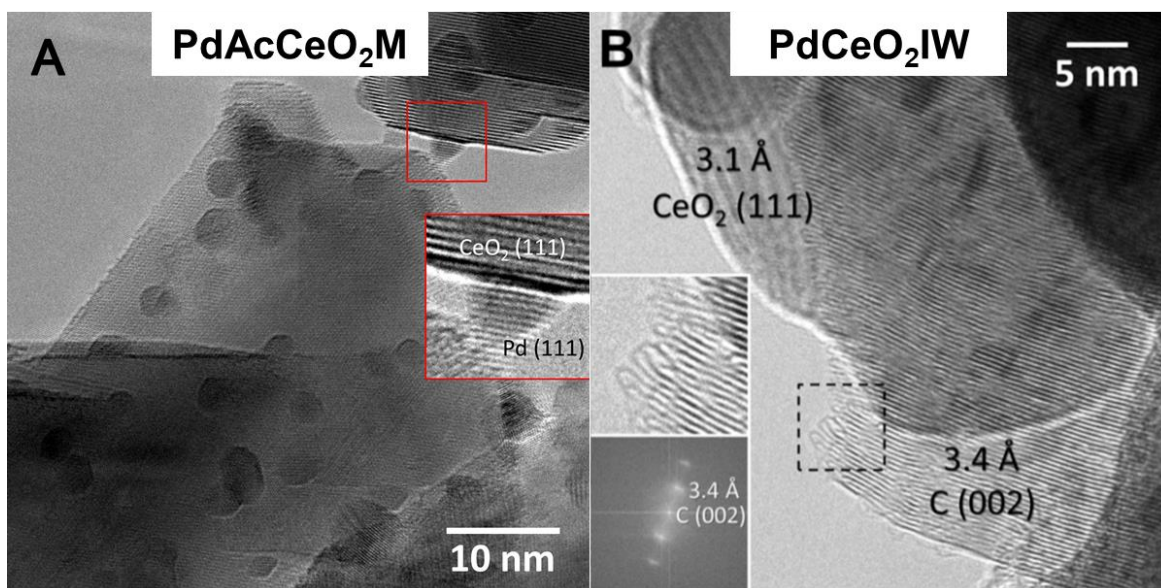

**Figure S13.** HRTEM images of (A) PdAcCeO<sub>2</sub>M and (B) PdCeO<sub>2</sub>IW after 24 h at 700 °C under DRM conditions.

**Table S3.** Particle size obtained through HR-TEM measurements under different pre-treatment and/or reaction conditions.

| Treatment               | PdAcCeO <sub>2</sub> M (nm) | PdCeO <sub>2</sub> IW (nm) |
|-------------------------|-----------------------------|----------------------------|
| H <sub>2</sub> – 400 °C | 3.5                         | 2.0                        |
| DRM – 400 °C            | 3.8                         | 2.8                        |
| DRM – 700 °C            | 3.3                         | 2.4                        |
| H <sub>2</sub> – 700 °C | 5.7                         | 5.0                        |
| He – 700 °C             | 5.2                         | 4.6                        |

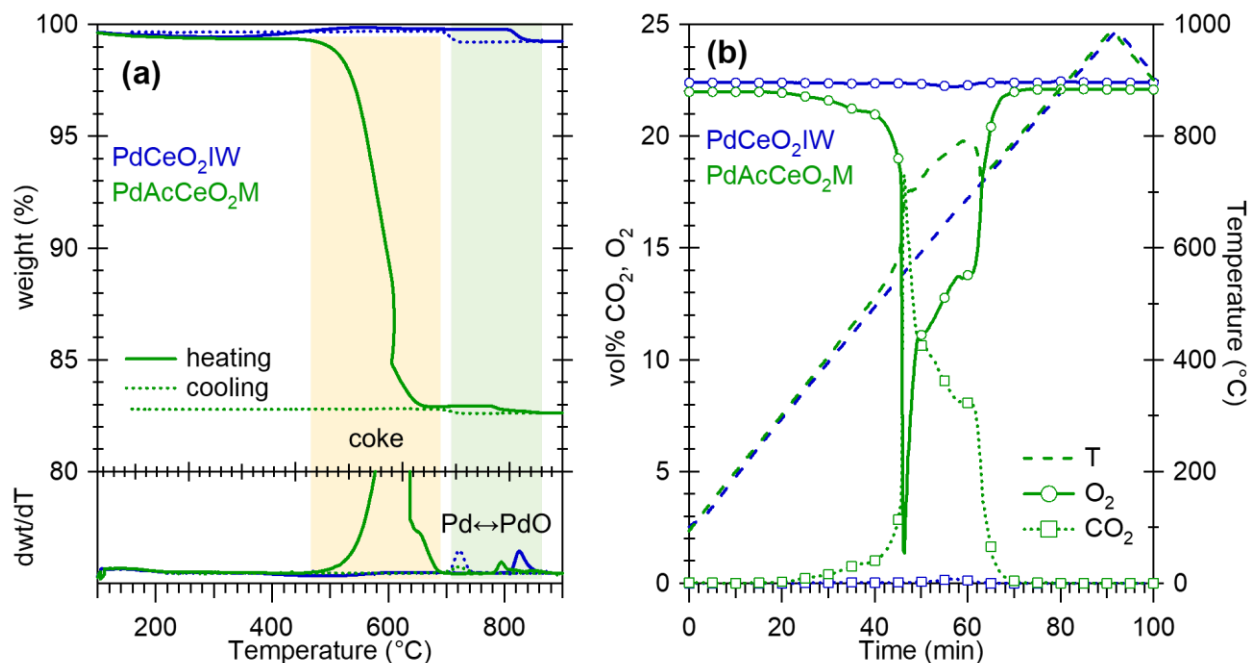

**Figure S14.** (a) Thermogravimetric Analysis (TGA) and (b) Temperature Programmed Oxidation (TPO) tests of the PdCeO<sub>2</sub>IW and PdAcCeO<sub>2</sub>M samples after prolonged stability test under DRM conditions (24 h, 700 °C). TGA experiments were carried out in a Q500 (TA Instruments) exposing ca. 15 mg of sample loaded in a platinum pan to a flow of air (60 mL/min) and heating to 900 °C at 10 °C/min while continuously monitoring its weight evolution. Oxidation tests were performed loading 60 mg of sample in a quartz tube reactor on a quartz wool bed; the catalyst powder was exposed to a flow of air (60 mL/min) and heated at 10 °C/min to 1000 °C, while the O<sub>2</sub> and CO<sub>2</sub> gas concentration were continuously measured with an on line ABB Magnos 106 – Uras 14 gas analyzer.

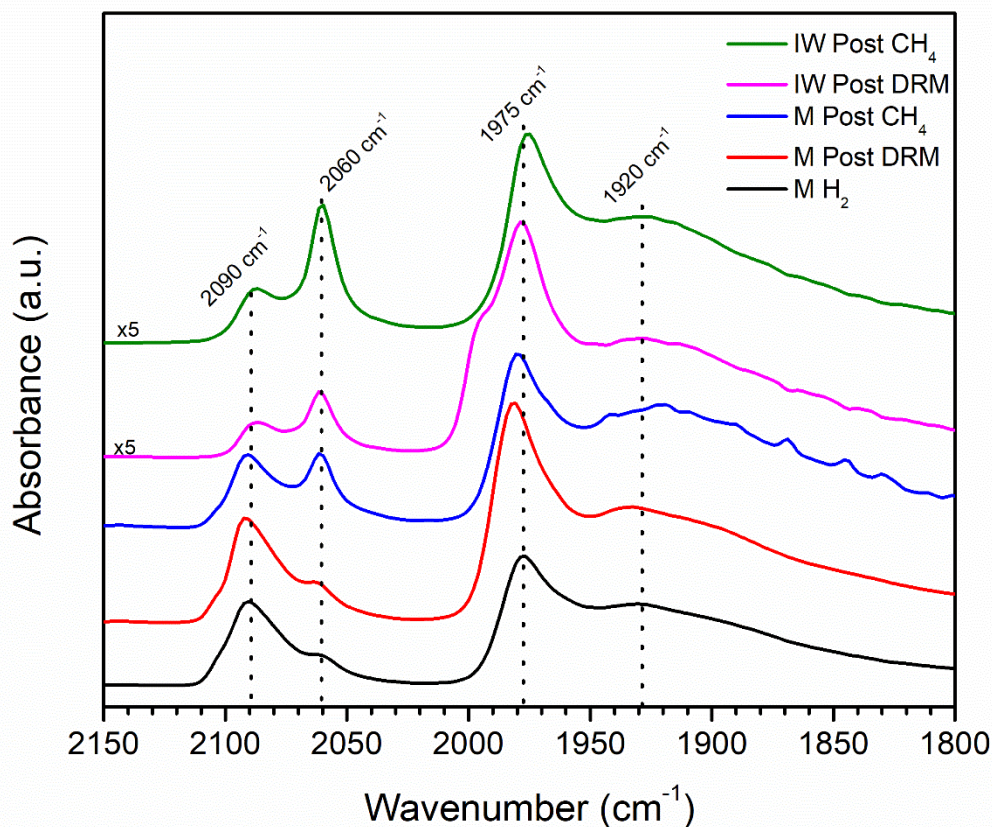

**Figure S15.** *In-situ* DRIFTS spectra collected over PdAcCeO<sub>2</sub>M (M) and PdCeO<sub>2</sub>IW (IW) after exposure to 10%CO/He for 15 min and a subsequent He purge for 5 min, at room temperature. All samples were pretreated under H<sub>2</sub> at 400 °C for 1 h and DRM indicated samples were treated to an additional hour under DRM conditions (CH<sub>4</sub>/CO<sub>2</sub>/He = 5/5/30 mL/min) at 400 °C while CH<sub>4</sub> indicated spectra were treated under a CH<sub>4</sub> TPR (CH<sub>4</sub>/He 12.5/37.5 mL/min) to 400 °C using a ramp rate of 10 °C/min and held at 400 °C for 5 min to stabilize the temperature. All spectra were collected at room temperature.

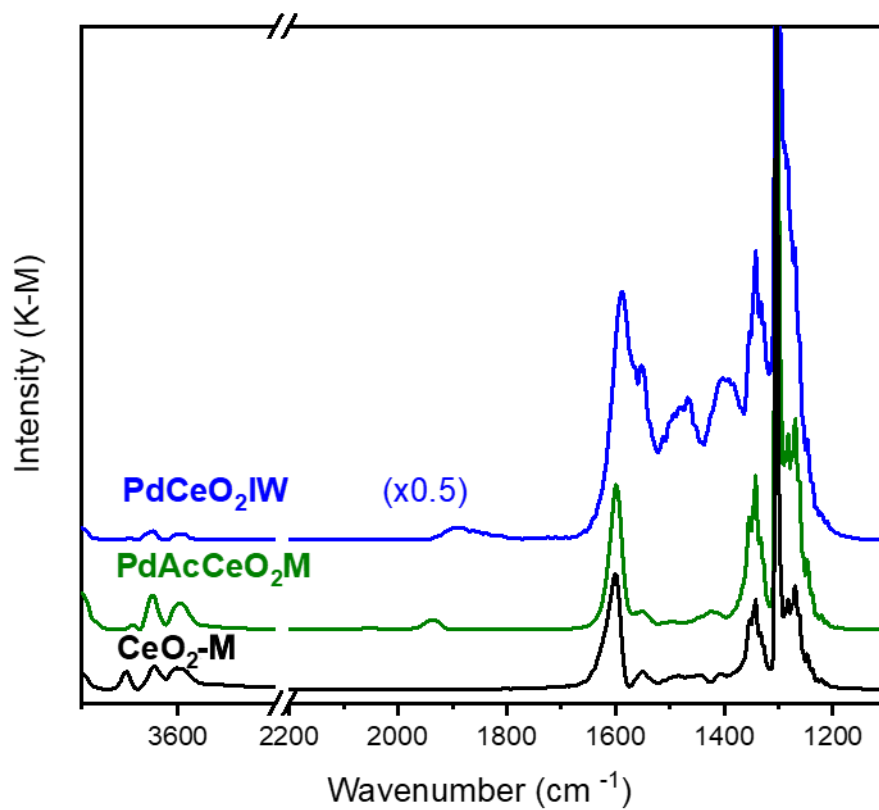

**Figure S16.** *In-situ* DRIFTS spectra collected over PdAcCeO<sub>2</sub>M, PdCeO<sub>2</sub>IW and CeO<sub>2</sub>-M under steady-state conditions (CH<sub>4</sub>/CO<sub>2</sub>/He = 5/5/30 mL/min) at 250 °C.

**Table S4.** Assignment of IR bands.

| Wavenumber (cm <sup>-1</sup> ) | Assignment                     | Reference    |
|--------------------------------|--------------------------------|--------------|
| 2350                           | CO <sub>2,gas</sub>            | 10           |
| 1305                           | CH <sub>4,gas</sub>            | 11, 6        |
| 2085                           | CO-O <sub>v</sub> -PdO(101)    | 12           |
| 2180-2130                      | CO-Pd <sup>2+</sup> linear     | 13           |
| 2130-2100                      | CO-Pd <sup>+</sup> linear      | 13-15        |
| 2130-2100                      | CO-Pd <sup>δ+</sup> (C) linear | 16           |
| 2090-2034                      | CO-Pd <sup>0</sup> linear      | 10,12, 17-19 |
| 1980-1890                      | CO-Pd <sup>0</sup> bridged     | 10, 20       |
| 1900-1830                      | CO-Pd <sup>0</sup> hollow      | 18           |
| 1577-1519,1353                 | Carbonates                     | 10, 20       |
| 1569-1600                      | Formates                       | 20           |



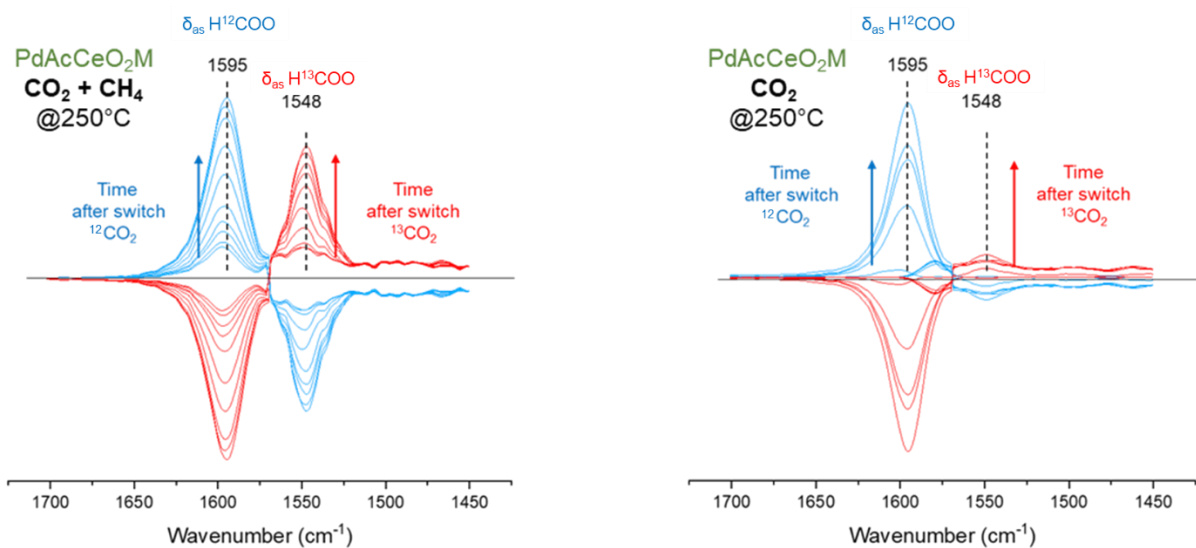

**Figure S17.** Time-resolved *in-situ* FTIR difference spectra of surface species formed during switch from  $^{12}\text{CO}_2$  to  $^{13}\text{CO}_2$  (red spectra) and  $^{13}\text{CO}_2$  to  $^{12}\text{CO}_2$  (blue spectra) mixture at 250°C at 1 atm under  $\text{CO}_2$  and  $\text{CH}_4$  (left) ( $\text{CH}_4/^{12}\text{CO}_2$  ( $^{13}\text{CO}_2$ ) /He = 5/5/30 mL/min) and only  $\text{CO}_2$  (right) ( $^{12}\text{CO}_2$  ( $^{13}\text{CO}_2$ ) /He = 5/5/35 mL/min at 250 °C). Total time was from 0 to 100 seconds and each scan was collected every 5 seconds.

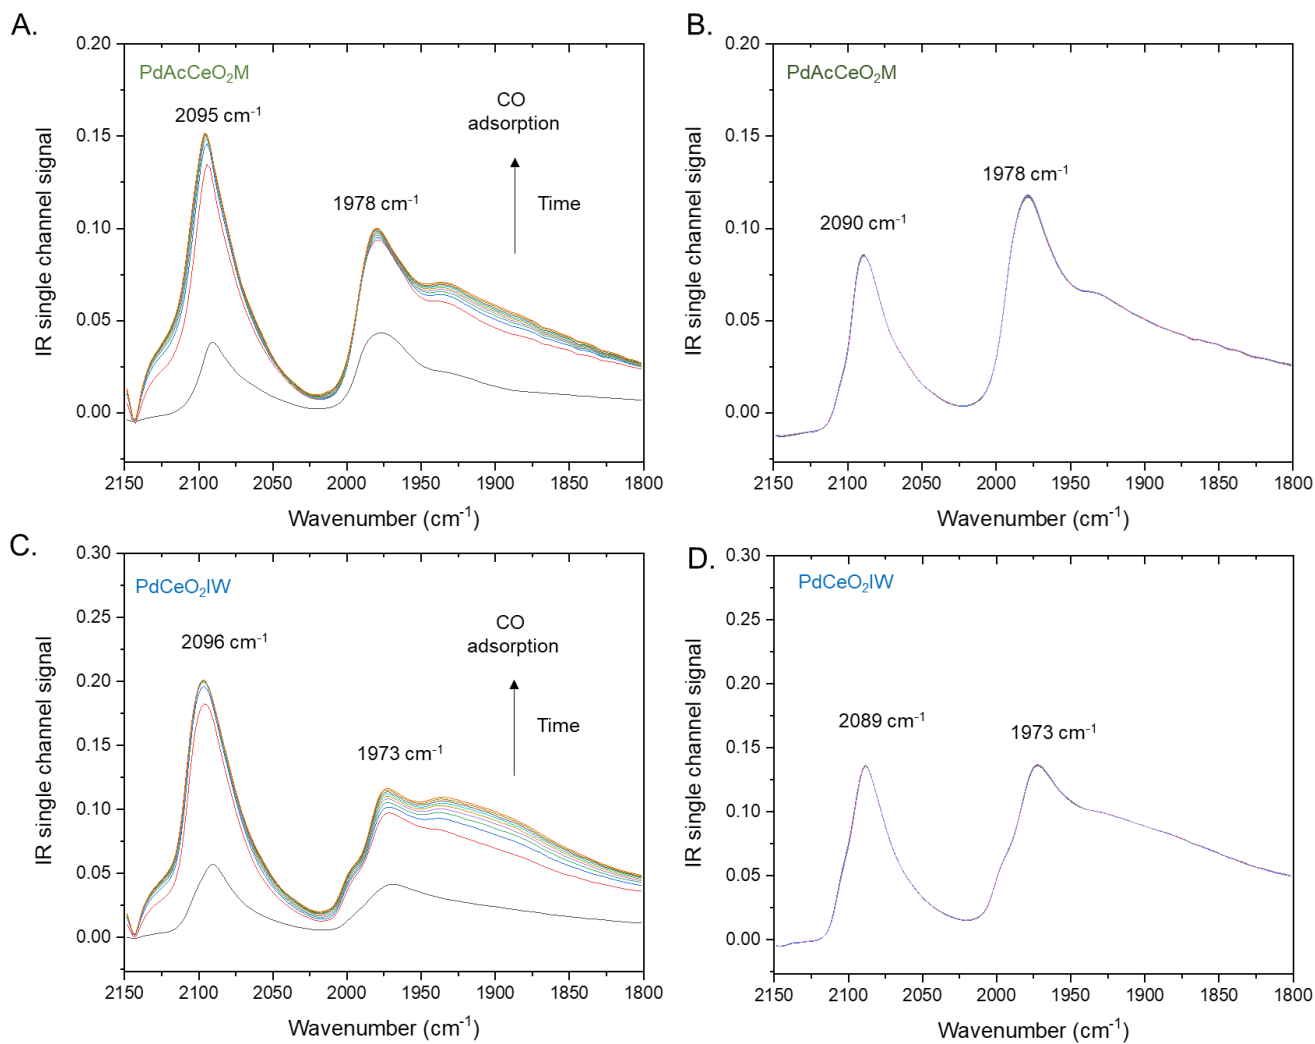

**Figure S18.** (A) *In-situ* DRIFTS spectra collected at room temperature on PdAcCeO<sub>2</sub>M under CO and (B) subsequent He purge. (C) PdCeO<sub>2</sub>IW under CO and (D) subsequent He purge. Conditions: 50 mL/min flow (UHP He for purge or 10 % CO in balance He).

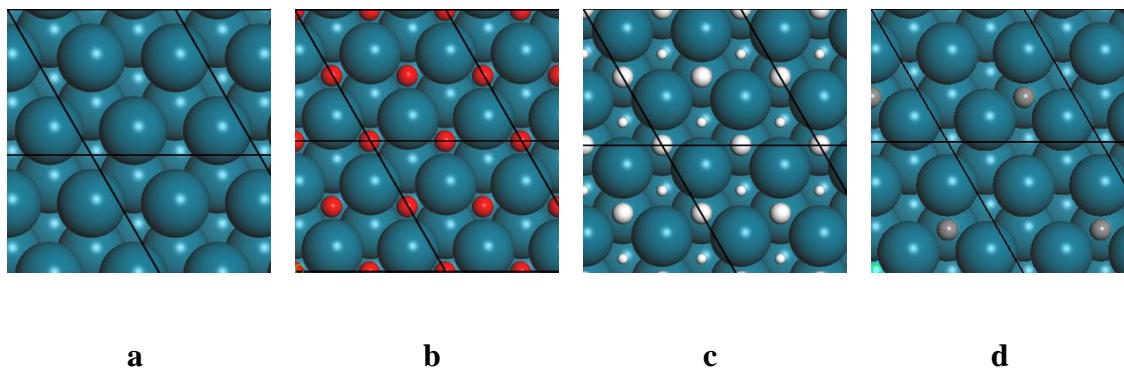

**Figure S19.** Top view of DFT-optimized surfaces: a: Pd(111), b: Pd(111)<sub>O-1ML</sub>, c: PdH(111), d: Pd(111)<sub>C-1ML</sub>. Atom colors: Pd: blue, H: white, O: red, C: grey.

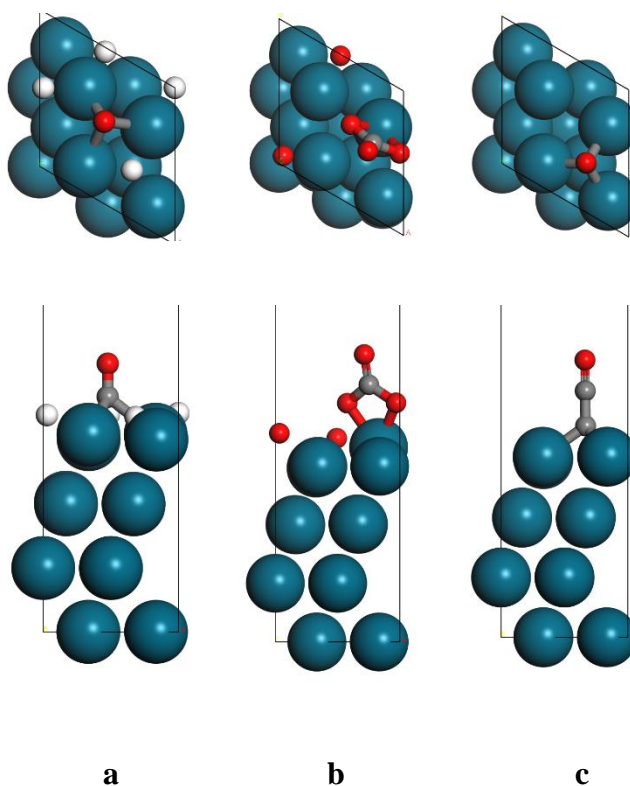

**Figure S20.** Top and side view of DFT-optimized \*CO adsorption on Pd<sub>3</sub>-fcc site of Pd(111)<sub>H-1ML</sub> (a), O<sub>2</sub>-bridge site of Pd(111)<sub>O-1ML</sub> (b) and C-top site of Pd(111)<sub>C-0.25ML</sub> (c). Atom colors: Pd: blue, H: white, O: red, C: grey.

## References

1. Reid, R.; Prausnitz, J.; Poling, B., Diffusion coefficients. *The properties of gases and liquids* **1987**.
2. Davis, M. E.; Davis, R. J., *Fundamentals of chemical reaction engineering*. Courier Corporation: 2012.
3. Pino, L.; Italiano, C.; Laganà, M.; Vita, A.; Recupero, V., Kinetic study of the methane dry (CO<sub>2</sub>) reforming reaction over the Ce<sub>0.70</sub>La<sub>0.20</sub>Ni<sub>0.10</sub>O<sub>2-δ</sub> catalyst. *Catal. Sci. Technol.* **2020**, *10* (8), 2652-2662.
4. Margossian, T.; Larmier, K.; Kim, S. M.; Krumeich, F.; Fedorov, A.; Chen, P.; Müller, C. R.; Copéret, C., Molecularly Tailored Nickel Precursor and Support Yield a Stable Methane Dry Reforming Catalyst with Superior Metal Utilization. *J. Am. Chem. Soc.* **2017**, *139* (20), 6919-6927.
5. Li, X.; Li, D.; Tian, H.; Zeng, L.; Zhao, Z.-J.; Gong, J., Dry reforming of methane over Ni/La<sub>2</sub>O<sub>3</sub> nanorod catalysts with stabilized Ni nanoparticles. *Appl. Catal., B* **2017**, *202*, 683-694.
6. Liu, Z.; Zhang, F.; Rui, N.; Li, X.; Lin, L.; Betancourt, L. E.; Su, D.; Xu, W.; Cen, J.; Attenkofer, K.; Idriss, H.; Rodriguez, J. A.; Senanayake, S. D., Highly Active Ceria-Supported Ru Catalyst for the Dry Reforming of Methane: In Situ Identification of Ru<sup>δ+</sup>-Ce<sup>3+</sup> Interactions for Enhanced Conversion. *ACS Catal.* **2019**, *9* (4), 3349-3359.
7. Singha, R.; Shukla, A.; Sandapatla, A.; Deo, G.; Bal, R., Synthesis and catalytic activity of a Pd doped Ni-MgO catalyst for dry reforming of methane. *J. Mater. Chem. A* **2017**, *5* (30), 15688-15699.
8. Shang, Z.; Li, S.; Li, L.; Liu, G.; Liang, X., Highly active and stable alumina supported nickel nanoparticle catalysts for dry reforming of methane. *Appl. Catal., B* **2017**, *201*, 302-309.
9. Guo, D.; Lu, Y.; Ruan, Y.; Zhao, Y.; Zhao, Y.; Wang, S.; Ma, X., Effects of extrinsic defects originating from the interfacial reaction of CeO<sub>2-x</sub>-nickel silicate on catalytic performance in methane dry reforming. *Appl. Catal., B* **2020**, *277*, 119278.
10. Demoulin, O.; Navez, M.; Ruiz, P., Investigation of the behaviour of a Pd/γ-Al<sub>2</sub>O<sub>3</sub> catalyst during methane combustion reaction using in situ DRIFT spectroscopy. *Appl. Catal., A* **2005**, *295* (1), 59-70.
11. Stotz, H.; Maier, L.; Boubnov, A.; Gremminger, A.; Grunwaldt, J.-D.; Deutschmann, O., Surface reaction kinetics of methane oxidation over PdO. *J. Catal.* **2019**, *370*, 152-175.
12. Martin, N. M.; Van den Bossche, M.; Grönbeck, H.; Hakanoglu, C.; Zhang, F.; Li, T.; Gustafson, J.; Weaver, J. F.; Lundgren, E., CO Adsorption on Clean and Oxidized Pd(111). *J. Phys. Chem. C* **2014**, *118* (2), 1118-1128.
13. Kyriakidou, E. A.; Lee, J.; Choi, J.-S.; Lance, M.; Toops, T. J., A comparative study of silver- and palladium-exchanged zeolites in propylene and nitrogen oxide adsorption and desorption for cold-start applications. *Catal. Today* **2021**, *360*, 220-233.

14. Terekhina, O.; Roduner, E., FTIR Spectroscopic Investigation of Zeolite-Supported Pd–Ag Bimetallic Clusters. *J. Phys. Chem. C* **2012**, *116* (12), 6973-6979.
15. Sheu, L.; Knözinger, H.; Sachtler, W., Ship-in-a-bottle formation of Pd<sub>13</sub>(CO)<sub>x</sub> clusters in zeolite NaY. *Catal. Lett.* **1989**, *2* (3), 129-137.
16. Jones, W.; Wells, P. P.; Gibson, E. K.; Chutia, A.; Silverwood, I. P.; Catlow, C. R. A.; Bowker, M., Carbidisation of Pd Nanoparticles by Ethene Decomposition with Methane Production. *ChemCatChem* **2019**, *11* (17), 4334-4339.
17. Lear, T.; Marshall, R.; Antonio Lopez-Sanchez, J.; Jackson, S. D.; Klapötke, T. M.; Bäumer, M.; Rupprechter, G.; Freund, H.-J.; Lennon, D., The application of infrared spectroscopy to probe the surface morphology of alumina-supported palladium catalysts. *J. Chem. Phys.* **2005**, *123* (17), 174706.
18. Khivantsev, K.; Jaegers, N. R.; Koleva, I. Z.; Aleksandrov, H. A.; Kovarik, L.; Engelhard, M.; Gao, F.; Wang, Y.; Vayssilov, G. N.; Szanyi, J., Stabilization of super electrophilic Pd<sup>1+2</sup> cations in small-pore SSZ-13 zeolite. *J. Phys. Chem. C* **2019**, *124* (1), 309-321.
19. Jbir, I.; Couble, J.; Khaddar-Zine, S.; Ksibi, Z.; Meunier, F. d.; Bianchi, D., Individual heat of adsorption of adsorbed CO species on palladium and Pd–Sn nanoparticles supported on Al<sub>2</sub>O<sub>3</sub> by using temperature-programmed adsorption equilibrium methods. *ACS Catal.* **2016**, *6* (4), 2545-2558.
20. Li, C.; Sakata, Y.; Arai, T.; Domen, K.; Maruya, K.-i.; Onishi, T., Carbon monoxide and carbon dioxide adsorption on cerium oxide studied by Fourier-transform infrared spectroscopy. Part 1.-Formation of carbonate species on dehydroxylated CeO<sub>2</sub>, at room temperature. *J. Chem. Soc., Faraday Trans. 1* **1989**, *85* (4), 929-943.
